# Supplementary material for: Concurrent and predictive validity of the Alberta Infant Motor Scale and the Peabody Developmental Motor Scales-2 administered to infants born preterm in Norway
Source: Springer Nature journal article supplement (doi:10.1186/s12887-023-04402-6), 2023-11-23

**Supplementary:** Flow of the participants through the study

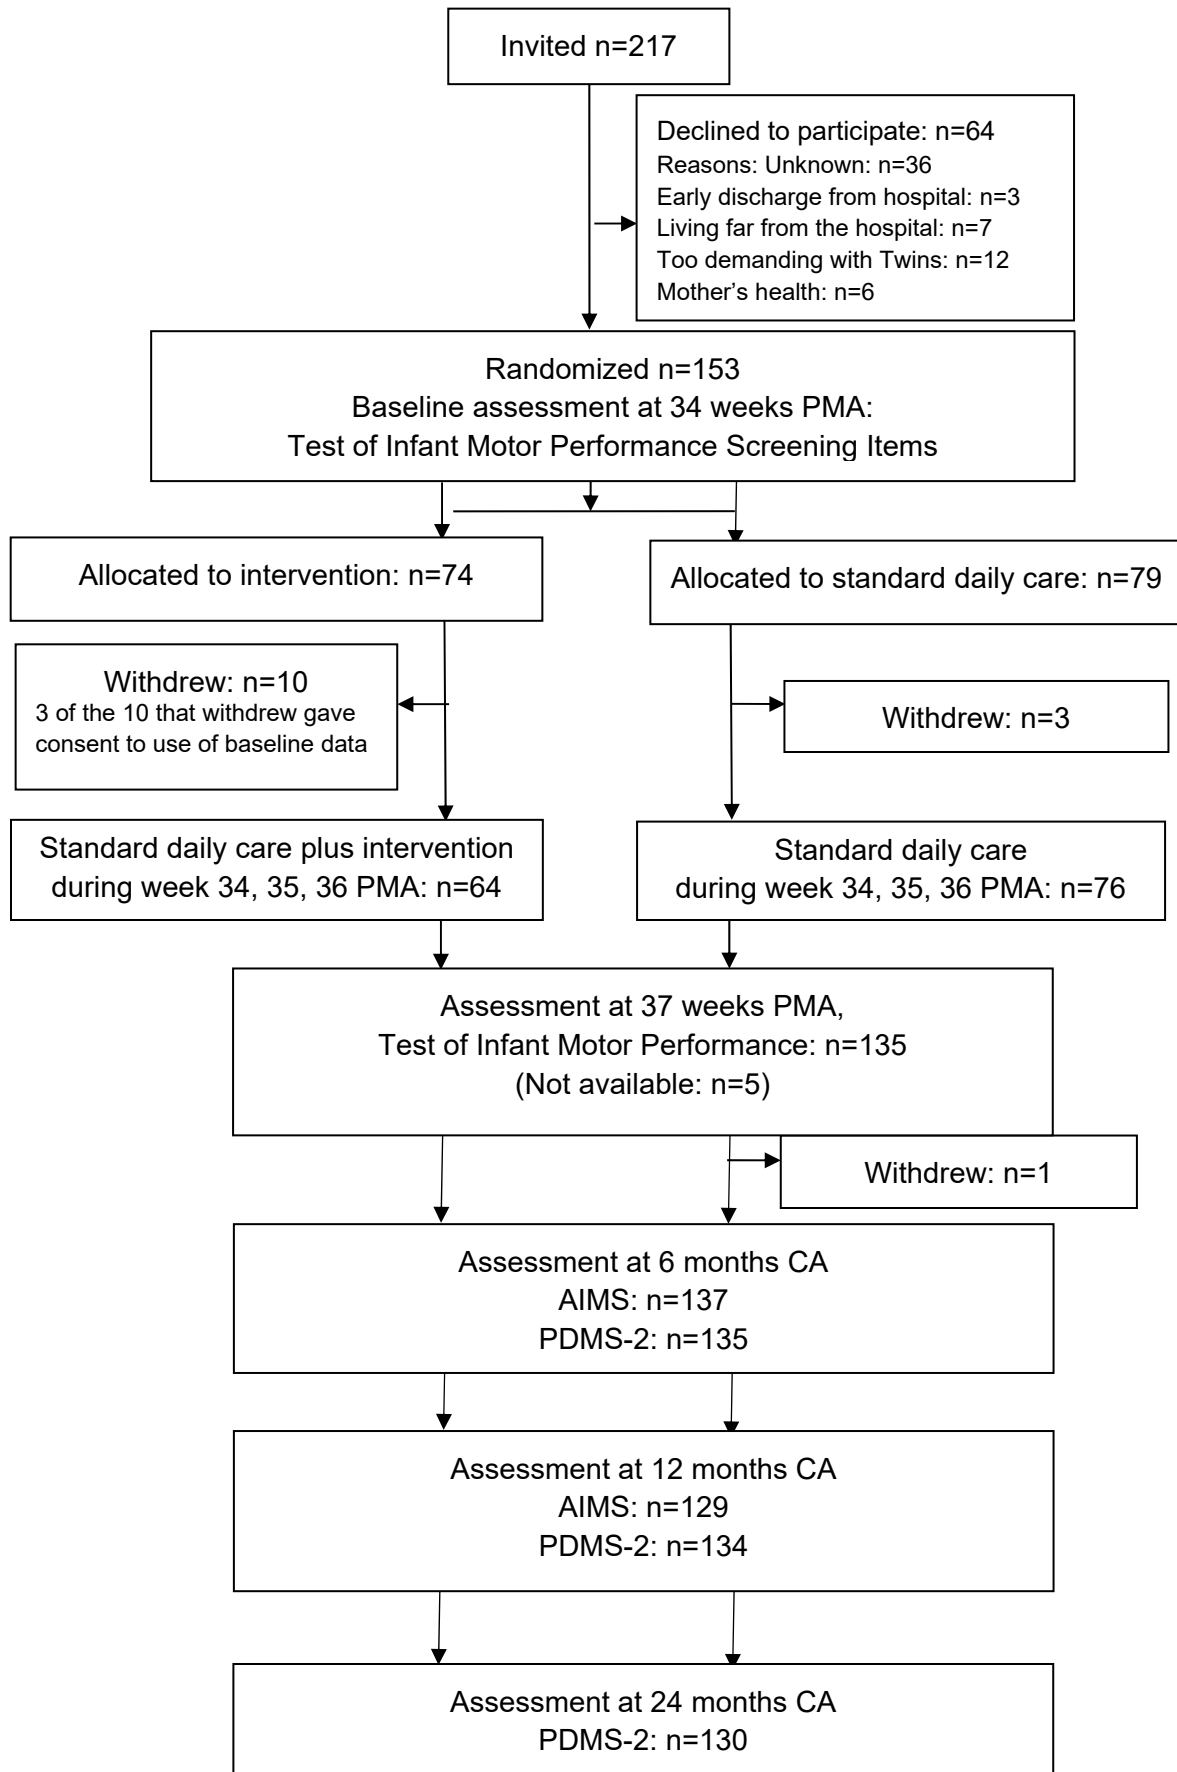

Supplement: MOESM1 [file 26349478]
